# Supplementary material for: [VO(acac)2] hybrid catalyst: from complex immobilization onto silica nanoparticles to catalytic application in the epoxidation of geraniol
Source: Royal Society of Chemistry journal article supplement (doi:10.1039/c1cy00090j), 2011-01-01

## Supplementary Information

### [VO(acac)<sub>2</sub>] hybrid catalyst: from complex immobilization onto silica nanoparticles to catalytic application in the epoxidation of geraniol

Clara Pereira, José F. Silva, André M. Pereira, João P. Araújo, Ginesa Blanco, Jose M. Pintado and Cristina Freire

**Figure S1.** Ninhydrin test for SiO<sub>2</sub> and APTES@SiO<sub>2</sub> nanomaterials.

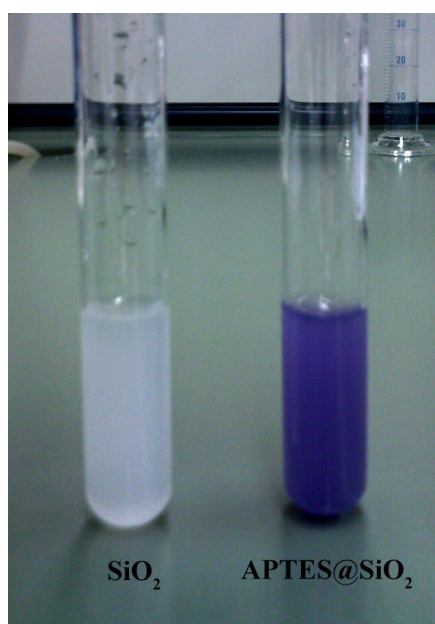

**Figure S2.** Temperature-dependent magnetic susceptibility curve of (a)  $[\text{VO}(\text{acac})_2]$  and (b)  $[\text{VO}(\text{acac})_2]\text{APTES}@\text{SiO}_2$ , in the 5–300 K range with  $H = 0.05$  T.

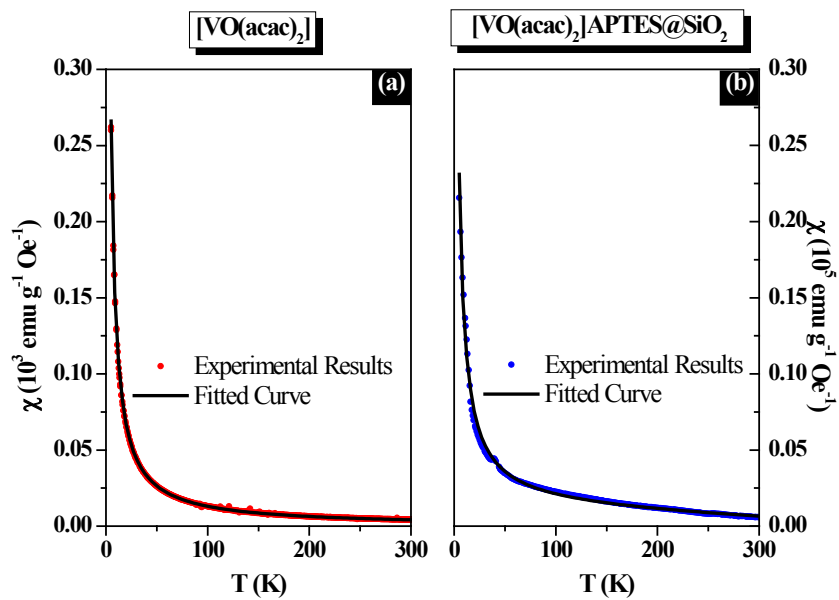

Supplement: c1cy00090j.pdf [file c1cy00090j.pdf]
